# Supplementary material
Source: PubMed Central journal article supplement (PMC4195759)
Supplement: embj0033-1751-sd2.pdf [file embj0033-1751-sd2.pdf]

# Supplementary Figure S2

**A**

| GENENAME      | oocyte_RPKM | 1-cell_RPKM | 2-cell_RPKM |          |
|---------------|-------------|-------------|-------------|----------|
| <i>oma-2</i>  | 1522.6      | 1256.1      | 611.3       | Controls |
| <i>tba-1</i>  | 2265.8      | 1230.9      | 782.6       |          |
| <i>nos-2</i>  | 375.9       | 699.2       | 924.5       |          |
| <i>pie-1</i>  | 396         | 332.5       | 183.8       |          |
| <i>oma-1</i>  | 510.5       | 237.3       | 222.5       |          |
| <i>lmn-1</i>  | 289.6       | 219.9       | 283         |          |
| <i>end-3</i>  | 0.7         | 1.4         | 2.7         |          |
| <i>hlh-1</i>  | 0.2         | 0.9         | 1.2         |          |
| <i>end-1</i>  | 0.3         | 0.8         | 1.1         |          |
| <i>msh-56</i> | 0.5         | 0.8         | 1.7         |          |
| <i>msh-81</i> | 0.6         | 0.7         | 1.5         |          |
| <i>elt-2</i>  | 0.1         | 0.5         | 0.4         |          |
| <i>ges-1</i>  | 0           | 0.2         | 0.2         |          |
| <i>msh-10</i> | 0.4         | 0.2         | 0.6         |          |
| <i>myo-3</i>  | 0           | 0.2         | 0.1         |          |
| <i>unc-25</i> | 0.2         | 0.2         | 0.1         |          |
| <i>med-1</i>  | 0           | 0.1         | 2.5         |          |
| <i>med-2</i>  | 0           | 0.1         | 3           |          |
| <i>myo-2</i>  | 0           | 0.1         | 0           |          |
| <i>unc-89</i> | 0.1         | 0.1         | 0.1         |          |

**B**

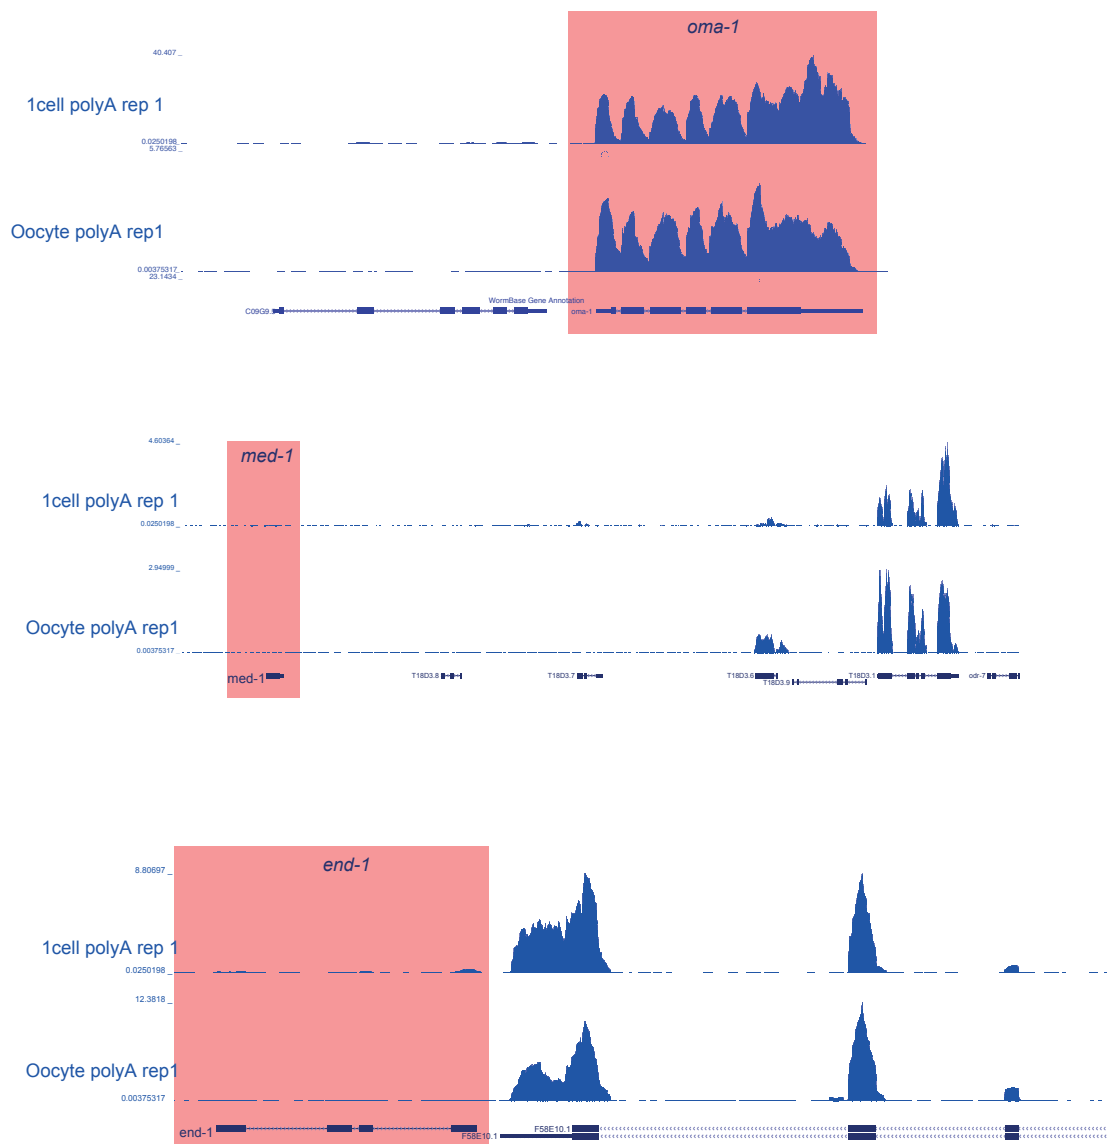

### **Supplementary Figure S2 | Assessment of sample purity.**

**A.** The purity of our oocytes and 1-cell and 2-cell embryos was validated by checking for marker gene expression. Shown are RPKM as a measure of mRNA expression. Transcripts with ~2 RPKM are virtually only expressed at background level. We did not observe zygotic transcripts that have been described to be expressed in 4- to 8-cell embryos (e.g. *med-1*, *end-3*, *end-1*) and did not detect transcripts which are highly expressed in muscle (*myo-3*, *myo-2*, *hlh-1*), neurons (*unc-8*, *unc-25*), gut (*elt-2*, *ges-1*) and sperm (*msp-10*, *msp-81*, *msp-56*, *spe-9*). Control genes that are known to be expressed in oocytes and early embryos (*pie-1*, *oma-1*, *oma-2*, *nos-2*) and structural genes (*tba-1*, *lmn-1*) were found to be highly expressed.

**B.** Genome browser snapshots of the reads of our oocytes and 1-cell embryos mapping to a gene known to be highly expressed in oocytes and embryos (*oma-1*, marked in red box) and zygotic transcripts (*med-1*, *end-1*; marked in red box).
