# Supplementary material
Source: PubMed Central journal article supplement (PMC4195759)
Supplement: embj0033-1751-sd3.pdf [file embj0033-1751-sd3.pdf]

# Supplementary Figure S3

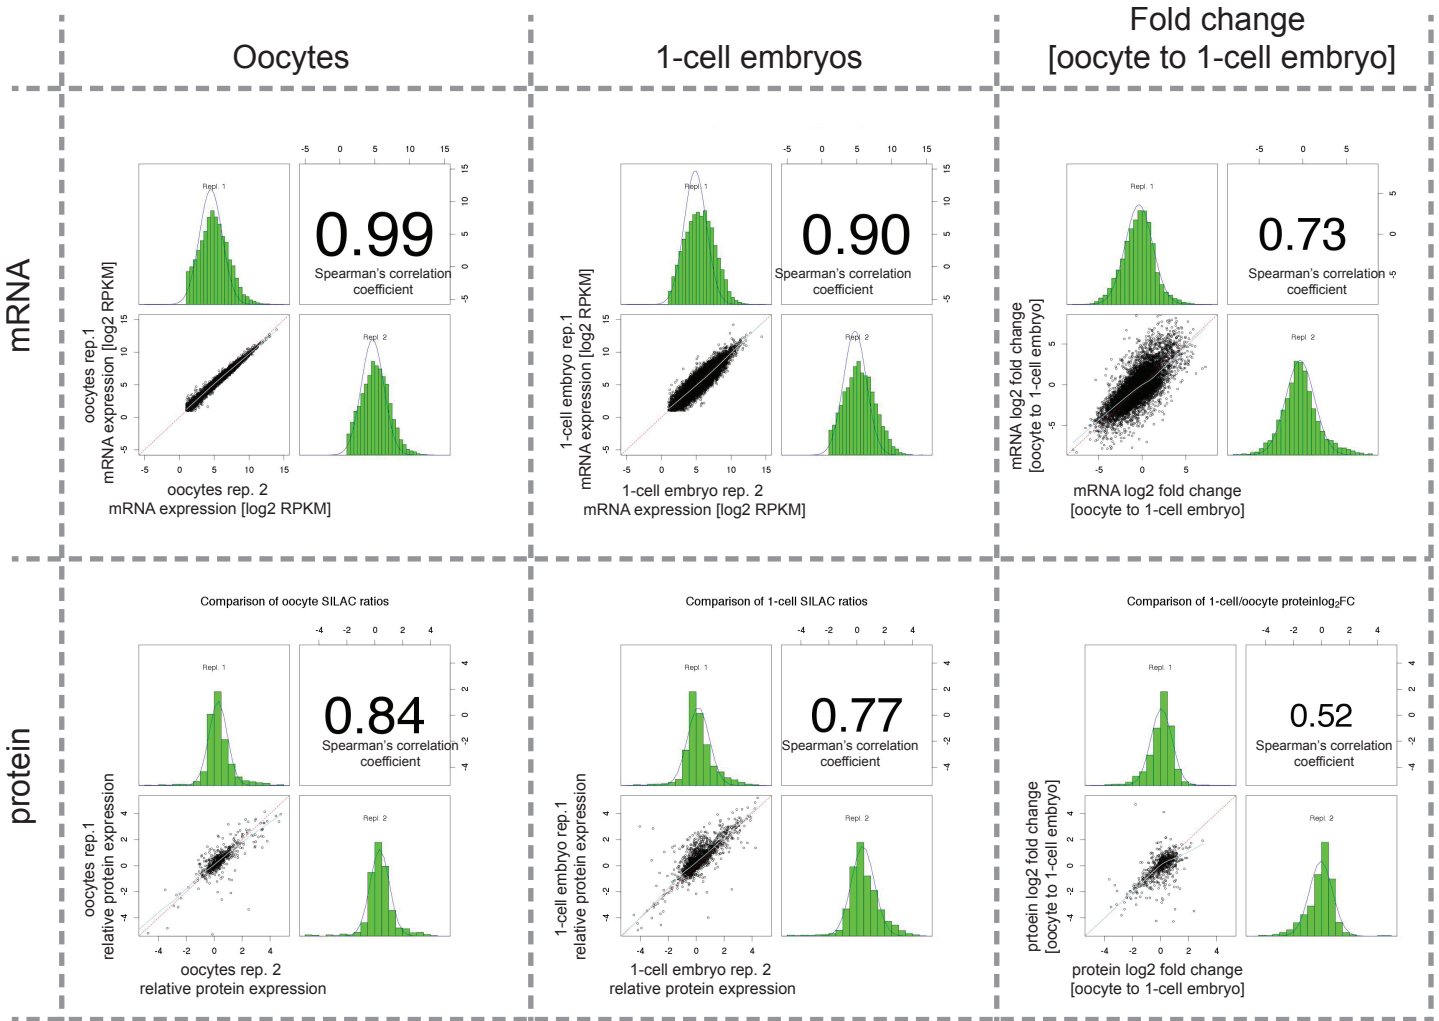

**Supplementary Figure S3 | Reproducibility of protein and mRNA fold changes in two independent biological replicates.** All proteome and transcriptome measurements were performed in independent biological replicates for all samples. Depicted is the correlation of mRNA expression and mRNA log<sub>2</sub>-fold change in two independent biological replicates and protein log<sub>2</sub>-fold changes between and within independent biological replicate measurements of the *in vivo* SILAC.
