# Supplementary material
Source: PubMed Central journal article supplement (PMC4195759)
Supplement: embj0033-1751-sd5.pdf [file embj0033-1751-sd5.pdf]

# Supplementary Figure S5

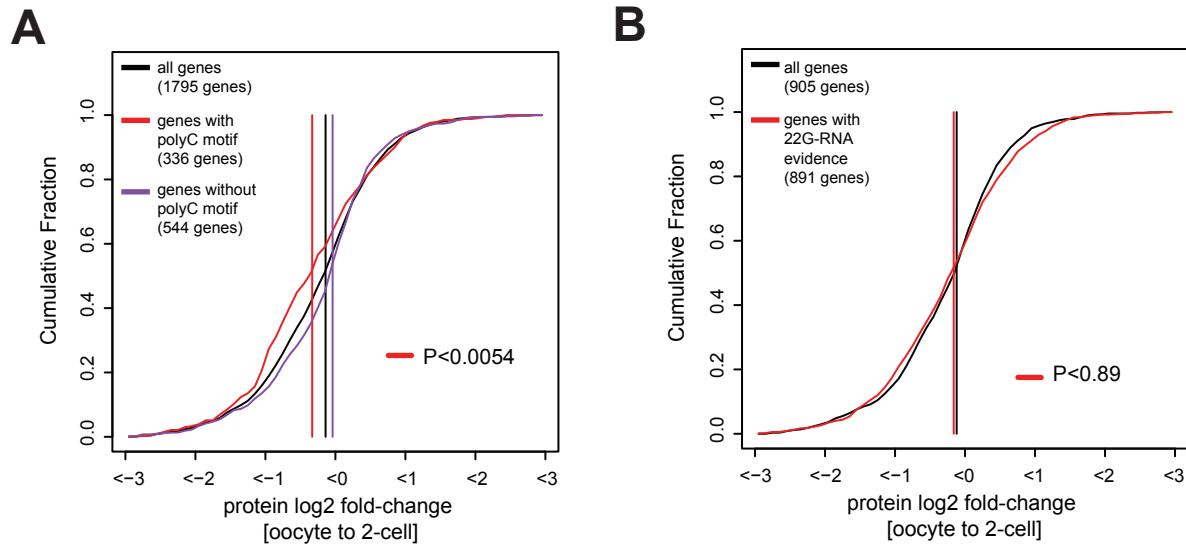

## Supplementary Figure S5 | Proteins of mRNAs that contain a polyC motif are also stronger downregulated at the OET.

**A.** Cumulative fraction of protein log<sub>2</sub>-fold changes between oocytes and 2-cell stage embryos. Genes that contain a polyC motif (red) in their 3'UTR are significantly more downregulated at this transition compared to all genes that do not contain a polyC motif (purple) ( $P < 0.0054$ , Wilcoxon rank-sum test).

**B.** Cumulative fraction of protein log<sub>2</sub>-fold changes between oocytes and 2-cell stage embryos. Genes that are targeted by silencing 22G-RNAs do not illustrate a significant shift compared to all proteins ( $P < 0.89$ , Wilcoxon rank-sum test).
